# Supplementary material for: Baloxavir outperforms oseltamivir, favipiravir, and amantadine in treating lethal influenza A(H5N1) HA clade 2.3.4.4b infection in mice
Source: Research Square preprint supplement (doi:10.21203/rs.3.rs-7768971/v1), 2025-10-20
Supplement: Supplementary file 1 [file e62f2b488d440db340779b4d.docx]

**Table S1.** Summary of antiviral treatment–emergent and mammalian host adaptation mutations in PA, PB2, and M2 proteins upon A/scaup/GA/22 challenge. Established markers of resistance are in bold.

| Animal ID /  treatment regimen | Substitution | Quasi-species [%] | Tissue | Comments |
| --- | --- | --- | --- | --- |
| #25 /  OSE 200 mg/kg/day | PB2-L207I | 15.0 | Lung | Identified in samples from oseltamivir- and amantadine-treated and control animals |
| PB2-E627K | 38.0 | Lung | The most commonly identified marker of mammalian host adaptation1; facilitates efficient viral replication in mammalian cells2; increases transmission in guinea pigs3 and ferrets4 |
| PA-C489S | 9.0 | Lung | Identified multiple times as a minor variant in lung and predominant in brain among all treated and control groups |
| PA-C489S | ≥95.0 | Brain |
| #26 /  OSE 200 mg/kg/day | PB2-L207I | 30.6 | Lung | Identified in samples from oseltamivir- and amantadine-treated and control animals |
| PB2-E627K | 9.6 | Lung | The most commonly identified marker of mammalian host adaptation1; facilitates efficient viral replication in mammalian cells2; increases transmission in guinea pigs3 and ferrets4 |
| PA-C489S | 12.6 | Lung | Identified multiple times as a minor variant in lung and predominant in brain among all treated and control groups |
| PA-C489S | ≥95.0 | Brain |
| #27 /  OSE 200 mg/kg/day | PB2-L207I | 14.3 | Lung | Identified in samples from oseltamivir- and amantadine-treated and control animals |
| PA-C489S | 8.0 | Lung | Identified multiple times as a minor variant in lung and predominant in brain among all treated and control groups |
| PA-C489S | ≥95.0 | Brain |
| #10 /  BXA 10 mg/kg | PB2-D701N | 62.3 | Lung | Enhances polymerase activity, viral replication, and pathogenicity in mice5; correlates with severe or fatal outcomes in humans6; and promotes nuclear transport of viral ribonucleoproteins in mammalian cells7 |
| PB2-D701N | ≥95.0 | Brain |
| PA-**I38L** | ≥95.0 | Lung | Significant marker of CENI resistance; confers 6- to 9-fold reduced susceptibility of A(H1N1)pdm09 viruses to BXA8-10 |
| PA-**I38L** | ≥95.0 | Brain |
| PA-C489S | 15.0 | Lung | Identified multiple times as a minor variant in lung and predominant in brain among all treated and control groups |
| PA-C489S | ≥95.0 | Brain |
| #11 /  BXA 10 mg/kg | PA-I38V | 37.3 | Lung | Polymorphic substitution widely adopted by avian A(H9N2) viruses circulating in Eastern Mediterranean region11; confers <3-fold decrease in CENI susceptibility12 |
| PA-C489S | 7.3 | Lung | Identified multiple times as a minor variant in lung and predominant in brain among all treated and control groups |
| PA-C489S | ≥95.0 | Brain |
| #12 /  BXA 10 mg/kg | PA-C489S | 5.3 | Lung | Identified multiple times as a minor variant in lung and predominant in brain among all treated and control groups |
| PA-C489S | ≥95.0 | Brain |
| #40 /  T-705 300 mg/kg/day | PB2-E627K | 32.5 | Lung | The most commonly identified marker of mammalian host adaptation1; facilitates efficient viral replication in mammalian cells2; increases transmission in guinea pigs3 and ferrets4 |
| #41 /  T-705 300 mg/kg/day | PA-C489S | 6.3 | Lung | Identified multiple times as a minor variant in lung and predominant in brain among all treated and control groups |
| PA-C489S | ≥95.0 | Brain |
| #42 /  T-705 300 mg/kg/day | PB2-E627K | 29.6 | Lung | The most commonly identified marker of mammalian host adaptation1; facilitates efficient viral replication in mammalian cells2, increases transmission in guinea pigs3 and ferrets4 |
| PB2-D701N | 11.2 | Lung | Enhances polymerase activity, viral replication, and pathogenicity in mice5; correlates with severe or fatal outcomes in humans6; and promotes nuclear transport of viral ribonucleoproteins in mammalian cells7 |
| PA-C489S | 11.2 | Lung | Identified multiple times as a minor variant in lung and predominant in brain among all treated and control groups |
| PA-C489S | ≥95.0 | Brain |

| Animal ID /  Treatment regimen | Substitution | Quasi-species [%] | Tissue | Comments |
| --- | --- | --- | --- | --- |
| #65 /  AMA 300 mg/kg/day | PB2-L207I | 6.4 | Lung | Identified in samples from oseltamivir- and amantadine-treated and control animals |
| PA-C489S | 12.8 | Lung | Identified multiple times as a minor variant in lung and predominant in brain among all treated and control groups |
| M2-K12R | ≥95.0 | Brain |  |
| M2-N18K | ≥95.0 | Brain |  |
| M2-S20N | ≥95.0 | Brain |  |
| M2-V51I | ≥95.0 | Brain |  |
| M2-G61R | ≥95.0 | Brain |  |
| #66 /  AMA 300 mg/kg/day | PB2-L207I | 6.9 | Lung | Identified in samples from oseltamivir- and amantadine-treated and control animals |
| PA-C489S | 15.1 | Lung | Identified multiple times as a minor variant in lung and predominant in brain among all treated and control groups |
| M2-K12R | ≥95.0 | Brain |  |
| M2-N18K | ≥95.0 | Brain |  |
| M2-S20N | ≥95.0 | Brain |  |
| M2-V51I | ≥95.0 | Brain |  |
| M2-G61R | ≥95.0 | Brain |  |
| #67 /  AMA 300 mg/kg/day | PA-C489S | 14.4 | Lung | Identified multiple times as a minor variant in lung and predominant in brain among all treated and control groups |
| PA-C489S | 92.2 | Brain |
| #68 /  AMA 300 mg/kg/day | PA-C489S | 13.7 | Lung | Identified multiple times as a minor variant in lung and predominant in brain among all treated and control groups |
| M2-K12R | ≥95.0 | Brain |  |
| M2-N18K | ≥95.0 | Brain |  |
| M2-S20N | 83.4 | Brain |  |
| M2-V51I | ≥95.0 | Brain |  |
| M2-G61R | ≥95.0 | Brain |  |
| #70 /  AMA 300 mg/kg/day | PB2-D701N | 83.4 | Lung | Enhances polymerase activity, viral replication, and pathogenicity in mice5; correlates with severe or fatal outcomes in humans6; and promotes nuclear transport of viral ribonucleoproteins in mammalian cells7 |
| M2-K12R | 84.5 | Brain |  |
| M2-N18K | 75.7 | Brain |  |
| M2-S20N | 65.1 | Brain |  |
| M2-**S31N** | 18.9 | Brain | Significant clinical marker conferring resistance to adamantanes13; abundantly present (in >99%) among seasonal influenza A(H1N1) and A(H3N2) viruses14 |
| M2-V51I | ≥95.0 | Brain |  |
| M2-G61R | 85.4 | Brain |  |
| #71 /  Control (untreated) | PB2-E627K | 88.1 | Lung | The most commonly identified marker of mammalian host adaptation1; facilitates efficient viral replication in mammalian cells2; increases transmission in guinea pigs3 and ferrets4. |
| PB2-E627K | ≥95.0 | Brain |
| PA-C489S | 12.8 | Lung | Identified multiple times as a minor variant in lung and predominant in brain among all treated and control groups |
| PA-C489S | ≥95.0 | Brain |
| #73 /  Control (untreated) | PB2-L207I | 75.2 | Lung | Identified in samples from oseltamivir- and amantadine-treated and control animals |
| PB2-L207I | 74.7 | Brain |
| PB2-D701N | 6.5 | Brain | Enhances polymerase activity, viral replication, and pathogenicity in mice5; correlates with severe or fatal outcomes in humans6; and promotes nuclear transport of viral ribonucleoproteins in mammalian cells7 |
| PA-C489S | 16.2 | Lung | Identified multiple times as a minor variant in lung and predominant in brain among all treated and control groups |
| PA-C489S | 16.5 | Brain |
| Animal ID /  Treatment regimen | Substitution | Quasi-species [%] | Tissue | Comments |
| #75 /  Control (untreated) | PA-C489S | 10.1 | Lung | Identified multiple times as a minor variant in lung and predominant in brain among all treated and control groups |
| PA-C489S | 14.7 | Brain |
| #76 /  Control (untreated) | PA-C489S | 11.4 | Lung | Identified multiple times as a minor variant in lung and predominant in brain among all treated and control groups |
| PA-C489S | 86.4 | Brain |
| #79 /  Control (untreated) | PB2-L207I | 74.6 | Lung | Identified in samples from oseltamivir- and amantadine-treated and control animals |
| PB2-L207I | ≥95.0 | Brain |
| PA-C489S | 14.8 | Lung | Identified multiple times as a minor variant in lung and predominant in brain among all treated and control groups |
| PA-C489S | ≥95.0 | Brain |

**SUPPLEMENTARY FIGURES**

**Figure S1.** **Delayed oseltamivir treatment of mice challenged with A(H5N1) clade 2.3.4.4b viruses. a,b,** Survival in mice challenged with 5 MLD50 of A/scaup/GA/22 (**a**) or A/ hawk/NC/22 (**b**) and treated with oseltamivir (oral) at clinically relevant regimens starting at +24 hpi. **c,d,** Histomorphometry of the lung tissues of control (untreated) BALB/c mice challenged with A/scaup/GA/22 at 3 dpi (**c**) and 6 dpi (**d**). The total lung areas examined are outlined in green; red-shaded areas are bronchioles/alveoli with active virus infection (i.e., containing antigen-positive cells). The average percentage area with active virus infection area is indicated as in red text, and the average severity score ± standard SEM for lung lesions and inflammation is shown in blue text. ***P*≤ 0.01.

**Figure S2.** **Oseltamivir pre-exposure prophylaxis of mice challenged with A/scaup/GA/22. a–f,** Survival (**a**), mean survival time (**b**), body weight (**c**), clinical score (**d**), and virus titers in lung tissue (**e**) and brain tissue (**f**) at 3 dpi and 6 dpi in BALB/c mice challenged with 5 MLD50 of A/scaup/GA/22 and treated with oseltamivir (oral) starting at −4 hpi. ns, *P*> 0.05; ****P*≤ 0.001. L.O.D., lower limit of virus detection (10 log10TCID50/mL). MST, mean survival time (days).

**Figure S3.** **Baloxavir pre-exposure prophylaxis of mice challenged with A/scaup/GA/22. a–f,** Survival (**a**), mean survival time (**b**), body weight (**c**), clinical score (**d**), and virus titers in lung tissue (**e**) and brain tissue (**f**) at 3 dpi and 6 dpi in BALB/c mice challenged with 5 MLD50 of A/scaup/GA/22 and treated with baloxavir (subcutaneous) at −4 hpi. **P* ≤ 0.05; ***P*≤ 0.01; ****P*≤ 0.001. L.O.D., lower limit of virus detection (10 log10TCID50/mL. MST, mean survival time (days).

**Figure S4.** **a,b,** Body weight (**a**) and clinical score (**b**) in mock-infected BALB/c mice upon high-dose antiviral treatments (oseltamivir 200 mg/kg/day; baloxavir 10 mg/kg; favipiravir 300 mg/kg/day; amantadine 30 and 300 mg/kg/day).

**Figure S5.** Experimental design: BALB/c mice (n = 5 or n = 3/group) inoculated intranasally with A/hawk/NC/22 or A/scaup/GA/22 at 5 MLD50 received vehicle or oseltamivir/favipiravir/amantadine orally BID for 5 days starting at −4 hpi or 24 hpi or one dose of vehicle or baloxavir at −4 hpi or 24 hpi. Necropsy timepoints were at 3 dpi and 6 dpi. Terminal bleeding was conducted for surviving animals at 21 dpi for serological data collection.

**Figure S6.** Antibody levels against HA protein in mouse serum samples (as measured by HI assay; the dotted line indicates the limit of detection with a 1:10 serum dilution) were determined on surviving BALB/c mice at 21 dpi by using the standard HA inhibition protocol with 0.5% packed chicken red blood cells. Error bars represent the geometric mean titer ± SD. NA, not applicable—no surviving animals after 21 dpi.

**REFERENCES**

1. Subbarao, E. K., London, W. & Murphy, B. R. A single amino-acid in the Pb2 gene of influenza A virus is a determinant of host range. *J. Virol.* **67**, 1761-1764 (1993).

2. Massin, P., van der Werf, S. & Naffakh, N. Residue 627 of PB2 is a determinant of cold sensitivity in RNA replication of avian influenza viruses. *J. Virol.* **75**, 5398-5404 (2001).

3. Steel, J., Lowen, A. C., Mubareka, S. & Palese, P. Transmission of influenza virus in a mammalian host is increased by PB2 amino acids 627K or 627E/701N. *PLoS Pathog.* **5**, e1000252 (2009).

4. Herfst, S.*, et al.* Airborne transmission of influenza A/H5N1 virus between ferrets. *Science* **336**, 1534-1541 (2012).

5. Liu, S.*, et al.* Substitution of D701N in the PB2 protein could enhance the viral replication and pathogenicity of Eurasian avian-like H1N1 swine influenza viruses. *Emerg. Microbes Infect.* **7**, 75 (2018).

6. Nieto, A.*, et al.* Identification of rare PB2-D701N mutation from a patient with severe influenza: contribution of the PB2-D701N mutation to the pathogenicity of human influenza. *Front. Microbiol.* **8**, 575 (2017).

7. Sediri, H., Schwalm, F., Gabriel, G. & Klenk, H.-D. Adaptive mutation PB2 D701N promotes nuclear import of influenza vRNPs in mammalian cells. *Eur. J. Cell Biol.* **94**, 368-374 (2015).

8. Gubareva, L. V.*, et al.* Assessing baloxavir susceptibility of influenza viruses circulating in the United States during the 2016/17 and 2017/18 seasons. *Euro Surveill.* **24**, 1800666 (2019).

9. Chesnokov, A.*, et al.* Replicative fitness of seasonal influenza A viruses with decreased susceptibility to baloxavir. *J. Infect. Dis.* **221**, 367-371 (2020).

10. Hashimoto, T.*, et al.* Comprehensive assessment of amino acid substitutions in the trimeric RNA polymerase complex of influenza A virus detected in clinical trials of baloxavir marboxil. *Influenza Other Respir. Viruses* **15**, 389-395 (2021).

11. Andreev, K.*, et al.* Genotypic and phenotypic susceptibility of emerging avian influenza A viruses to neuraminidase and cap-dependent endonuclease inhibitors. *Antiviral Res.* **229**, 105959 (2024).

12. Omoto, S.*, et al.* Characterization of influenza virus variants induced by treatment with the endonuclease inhibitor baloxavir marboxil. *Sci. Rep.* **8**, 9633 (2018).

13. Hay, A. J., Zambon, M. C., Wolstenholme, A. J., Skehel, J. J. & Smith, M. H. Molecular basis of resistance of influenza A viruses to amantadine. *J. Antimicrob. Chemother.* **18**, 19-29 (1986).

14. Deyde, V. M.*, et al.* Surveillance of resistance to adamantanes among influenza A(H3N2) and A(H1N1) viruses isolated worldwide. *J. Infect. Dis.* **196**, 249-257 (2007).
